# Supplementary material
Source: PubMed Central journal article supplement (PMC9794950)
Supplement: jb.00335-22-s0001.pdf [file jb.00335-22-s0001.pdf]

**Supplementary Tables:**

**Supplementary Table 1.** Strains and plasmids used in this study. Antibiotic resistance is indicated by Gm (gentamycin), Cb (carbenicillin), and Kn (kanamycin).

| Strain name                                                                                       | Source    | Antibiotic resistance |
|---------------------------------------------------------------------------------------------------|-----------|-----------------------|
| PAO1 (Parsek)                                                                                     | (53)      |                       |
| PAO1 $\Delta$ <i>siaA</i>                                                                         | (48)      |                       |
| PAO1 $\Delta$ <i>siaB</i>                                                                         | This work |                       |
| PAO1 $\Delta$ <i>siaC</i>                                                                         | This work |                       |
| PAO1 $\Delta$ <i>siaD</i>                                                                         | (48)      |                       |
| PAO1 $\Delta$ <i>pslD</i>                                                                         | (13)      |                       |
| PAO1 pJN105                                                                                       | This work | Gm                    |
| PAO1 $\Delta$ <i>siaA</i> pJN105                                                                  | This work | Gm                    |
| PAO1 $\Delta$ <i>siaB</i> pJN105                                                                  | This work | Gm                    |
| PAO1 $\Delta$ <i>siaC</i> pJN105                                                                  | This work | Gm                    |
| PAO1 $\Delta$ <i>siaD</i> pJN105                                                                  | This work | Gm                    |
| PAO1 $\Delta$ <i>siaA</i> pJN105::P <sub>BAD</sub> - <i>siaA</i>                                  | This work | Gm                    |
| PAO1 $\Delta$ <i>siaB</i> pJN105::P <sub>BAD</sub> - <i>siaB</i>                                  | This work | Gm                    |
| PAO1 $\Delta$ <i>siaC</i> pJN105::P <sub>BAD</sub> - <i>siaC</i>                                  | This work | Gm                    |
| PAO1 $\Delta$ <i>siaD</i> pJN105::P <sub>BAD</sub> - <i>siaD</i>                                  | This work | Gm                    |
| PAO1 $\Delta$ <i>pelA</i>                                                                         | (54)      |                       |
| PAO1 $\Delta$ <i>cdrA</i>                                                                         | (11)      |                       |
| PAO1 miniTn7T2-PA1/04/03-GFP                                                                      | This work |                       |
| PAO1 $\Delta$ <i>siaA</i> miniTn7T2-PA1/04/03-GFP                                                 | This work |                       |
| PAO1 $\Delta$ <i>siaB</i> miniTn7T2-PA1/04/03-GFP                                                 | This work |                       |
| PAO1 $\Delta$ <i>siaC</i> miniTn7T2-PA1/04/03-GFP                                                 | This work |                       |
| PAO1 $\Delta$ <i>siaD</i> miniTn7T2-PA1/04/03-GFP                                                 | This work |                       |
| PAO1 miniTn7T2-PA1/04/03-GFP, pJN105                                                              | This work | Gm                    |
| PAO1 $\Delta$ <i>siaA</i> miniTn7T2-PA1/04/03-GFP, pJN105                                         | This work | Gm                    |
| PAO1 $\Delta$ <i>siaB</i> miniTn7T2-PA1/04/03-GFP, pJN105                                         | This work | Gm                    |
| PAO1 $\Delta$ <i>siaC</i> miniTn7T2-PA1/04/03-GFP, pJN105                                         | This work | Gm                    |
| PAO1 $\Delta$ <i>siaD</i> miniTn7T2-PA1/04/03-GFP, pJN105                                         | This work | Gm                    |
| PAO1 $\Delta$ <i>siaA</i> miniTn7T2-PA1/04/03-GFP, pJN105::P <sub>BAD</sub> - <i>siaA</i>         | This work | Gm                    |
| PAO1 $\Delta$ <i>siaB</i> miniTn7T2-PA1/04/03-GFP, pJN105::P <sub>BAD</sub> - <i>siaB</i>         | This work | Gm                    |
| PAO1 $\Delta$ <i>siaC</i> miniTn7T2-PA1/04/03-GFP, pJN105::P <sub>BAD</sub> - <i>siaC</i>         | This work | Gm                    |
| PAO1 $\Delta$ <i>siaD</i> miniTn7T2-PA1/04/03-GFP, pJN105::P <sub>BAD</sub> - <i>siaD</i>         | This work | Gm                    |
| PAO1 $\Delta$ <i>pslD</i> miniTn7T2-PA1/04/03-GFP                                                 | This work |                       |
| PAO1 $\Delta$ <i>pelA</i> miniTn7T2-PA1/04/03-GFP                                                 | This work |                       |
| PAO1 $\Delta$ <i>cdrA</i> miniTn7T2-PA1/04/03-GFP                                                 | This work |                       |
| PAO1 $\Delta$ <i>pslD</i> pJN105                                                                  | This work | Gm                    |
| PAO1 $\Delta$ <i>pslD</i> pJN105::P <sub>BAD</sub> - <i>pslD</i>                                  | This work | Gm                    |
| PAO1 $\Delta$ <i>pslD</i> miniTn7T2-PA1/04/03-GFP, pJN105                                         | This work | Gm                    |
| PAO1 $\Delta$ <i>pslD</i> miniTn7T2-PA1/04/03-GFP, pJN105::P <sub>BAD</sub> - <i>pslD</i>         | This work | Gm                    |
| PAO1 $\Delta$ <i>wspR</i>                                                                         | (25)      |                       |
| PAO1 $\Delta$ <i>sadC</i>                                                                         | (48)      |                       |
| PAO1 <i>siaD</i> <sup>E142A</sup>                                                                 | This work |                       |
| PAO1 <i>siaD</i> <sup>E142A</sup> pJN105                                                          | This work | Gm                    |
| PAO1 <i>siaD</i> <sup>E142A</sup> pJN105::P <sub>BAD</sub> - <i>siaD</i>                          | This work | Gm                    |
| PAO1 <i>siaD</i> <sup>E142A</sup> miniTn7T2-PA1/04/03-GFP                                         | This work |                       |
| PAO1 <i>siaD</i> <sup>E142A</sup> miniTn7T2-PA1/04/03-GFP, pJN105                                 | This work | Gm                    |
| PAO1 <i>siaD</i> <sup>E142A</sup> miniTn7T2-PA1/04/03-GFP, pJN105::P <sub>BAD</sub> - <i>siaD</i> | This work | Gm                    |

|                                                                                             |            |    |
|---------------------------------------------------------------------------------------------|------------|----|
| PAO1 $\Delta$ <i>siaD</i> pJN105::P <sub>BAD</sub> - <i>siaD</i> -his                       | This work  | Gm |
| PAO1 $\Delta$ <i>siaD</i> pJN105::P <sub>BAD</sub> - <i>siaD</i> <sup>E142A</sup> -his      | This work  | Gm |
| MPAO1 (Manoil PAO1)                                                                         | (37, 38)   |    |
| MPAO1 (PW1288) <i>siaD</i> (PA0169)::ISphoA/hah                                             | (37, 38)   |    |
| MPAO1 (PW1289) <i>siaD</i> (PA0169)::ISphoA/hah                                             | (37, 38)   |    |
| MPAO1 (PW1627) PA0338::ISphoA/hah                                                           | (37, 38)   |    |
| MPAO1 (PW1626) PA0338::ISlacZ/hah                                                           | (37, 38)   |    |
| MPAO1 (PW2543) PA0847::ISphoA/hah                                                           | (37, 38)   |    |
| MPAO1 (PW2544) PA0847::ISphoA/hah                                                           | (37, 38)   |    |
| MPAO1 (PW2999) <i>roeA</i> (PA1107)::ISlacZ/hah                                             | (37, 38)   |    |
| MPAO1 (PW3000) <i>roeA</i> (PA1107)::ISphoA/hah                                             | (37, 38)   |    |
| MPAO1 (PW3023) <i>tpbB</i> (PA1120)::ISlacZ/hah                                             | (37, 38)   |    |
| MPAO1 (PW3024) <i>tpbB</i> (PA1120)::ISphoA/hah                                             | (37, 38)   |    |
| MPAO1 (PW4043) <i>mucR</i> (PA1727)::ISlacZ/hah                                             | (37, 38)   |    |
| MPAO1 (PW4045) <i>mucR</i> (PA1727)::ISphoA/hah                                             | (37, 38)   |    |
| MPAO1 (PW7263) <i>wspR</i> (PA3702)::ISlacZ/hah                                             | (37, 38)   |    |
| MPAO1 (PW7264) <i>wspR</i> (PA3702)::ISphoA/hah                                             | (37, 38)   |    |
| MPAO1 (PW8315) <i>sadC</i> (PA4332)::ISphoA/hah                                             | (37, 38)   |    |
| MPAO1 (PW8314) <i>sadC</i> (PA4332)::ISlacZ/hah                                             | (37, 38)   |    |
| MPAO1 (PW9146) <i>gcbA</i> (PA4843)::ISphoA/hah                                             | (37, 38)   |    |
| MPAO1 (PW9145) <i>gcbA</i> (PA4843)::ISlacZ/hah                                             | (37, 38)   |    |
| MPAO1 (PW9347) <i>fimX</i> (PA4959)::ISphoA/hah                                             | (37, 38)   |    |
| MPAO1 (PW9346) <i>fimX</i> (PA4959)::ISlacZ/hah                                             | (37, 38)   |    |
| MPAO1 (PW10280) <i>dgcH</i> (PA5487)::ISlacZ/hah                                            | (37, 38)   |    |
| MPAO1 (PW10281) <i>dgcH</i> (PA5487)::ISphoA/hah                                            | (37, 38)   |    |
| PAO1 $\Delta$ <i>siaD</i> pJN105::P <sub>BAD</sub> - <i>ml1419c</i>                         | This work  | Gm |
| PAO1 $\Delta$ <i>siaD</i> pJN105::P <sub>BAD</sub> - <i>ml1419c</i> miniTn7T2-PA1/04/03-GFP | This work  | Gm |
| PAO1 P <sub>BAD</sub> - <i>psiABCDEFGHIJKL</i>                                              | (20)       |    |
| PAO1 $\Delta$ <i>siaD</i> P <sub>BAD</sub> - <i>psiABCDEFGHIJKL</i>                         | This work  |    |
| PAO1 P <sub>BAD</sub> - <i>psiABCDEFGHIJKL</i> miniTn7T2-PA1/04/03-GFP                      | This work  |    |
| PAO1 $\Delta$ <i>siaD</i> P <sub>BAD</sub> - <i>psiABCDEFGHIJKL</i> miniTn7T2-PA1/04/03-GFP | This work  |    |
| DH5 $\alpha$ pRK2013                                                                        | ATCC 37159 | Kn |
| DH5 $\alpha$ pDONRPEX18Gm:: $\Delta$ <i>siaB</i> <sub>26-128</sub>                          | This work  | Gm |
| DH5 $\alpha$ pDONRPEX18Gm:: $\Delta$ <i>siaC</i> <sub>7-121</sub>                           | This work  | Gm |
| DH5 $\alpha$ pDONRPEX18Gm:: $\Delta$ <i>siaD</i>                                            | (48)       | Gm |
| DH5 $\alpha$ pDONRPEX18Gm:: <i>siaD</i> <sup>E142A</sup>                                    | This work  | Gm |
| DH5 $\alpha$ pJN105                                                                         | (55)       | Gm |
| DH5 $\alpha$ pJN105::P <sub>BAD</sub> - <i>psiD</i>                                         | This work  | Gm |
| DH5 $\alpha$ pJN105::P <sub>BAD</sub> - <i>siaA</i>                                         | This work  | Gm |
| DH5 $\alpha$ pJN105::P <sub>BAD</sub> - <i>siaB</i>                                         | This work  | Gm |
| DH5 $\alpha$ pJN105::P <sub>BAD</sub> - <i>siaC</i>                                         | This work  | Gm |
| DH5 $\alpha$ pJN105::P <sub>BAD</sub> - <i>siaD</i>                                         | This work  | Gm |
| DH5 $\alpha$ pJN105::P <sub>BAD</sub> - <i>siaD</i> -his                                    | This work  | Gm |
| DH5 $\alpha$ pJN105::P <sub>BAD</sub> - <i>siaD</i> <sup>E142A</sup> -his                   | This work  | Gm |
| DH5 $\alpha$ pJN105::P <sub>BAD</sub> - <i>ml1419c</i>                                      | (43)       | Gm |
| DH5 $\alpha$ pBT270 (pUC18-miniTn7T2-PA1/04/03-GFP)                                         | (56)       | Gm |
| DH5 $\alpha$ pTNS1                                                                          | (57)       | Cb |

**Supplementary Table 2.** Primers used in this study.

| Primers                      | Function                                                   | Sequence 5'-3'                                                    |
|------------------------------|------------------------------------------------------------|-------------------------------------------------------------------|
| siaB-UP-F                    | Creation of pDONRPEX18Gm:: $\Delta$ siaB <sub>26-128</sub> | ATCCGGAAGCTTCTGCCAGTCGCCCTGGA<br>T                                |
| siaB-UP-R                    | Creation of pDONRPEX18Gm:: $\Delta$ siaB <sub>26-128</sub> | TGCTTCAACGGACCGTACAAGGAGCAGCT<br>ACGCCG                           |
| siaB-DN-F                    | Creation of pDONRPEX18Gm:: $\Delta$ siaB <sub>26-128</sub> | TAGCTGCTCCTTGTACGGTCCGTTGAAGCA<br>GAGC                            |
| siaB-DN-R                    | Creation of pDONRPEX18Gm:: $\Delta$ siaB <sub>26-128</sub> | ATCCGGCCCCGGGACTGACGGTTTCCTCGA<br>CCA                             |
| siaC-UP-F                    | Creation of pDONRPEX18Gm:: $\Delta$ siaC <sub>7-121</sub>  | ATCCGGCTGCAGGCCAATCTCAAGGGCTA<br>C                                |
| siaC-UP-R                    | Creation of pDONRPEX18Gm:: $\Delta$ siaC <sub>7-121</sub>  | CGGCTACTCGTCTGGGCCTGTATGTGCA<br>GGTCACTCATG                       |
| siaC-DN-F                    | Creation of pDONRPEX18Gm:: $\Delta$ siaC <sub>7-121</sub>  | CAGGCCACGACGAGTCAGGCCACGACG<br>AGT                                |
| siaC-DN-R                    | Creation of pDONRPEX18Gm:: $\Delta$ siaC <sub>7-121</sub>  | ATCCGGGAATCCCGCGGATCGAGGCTTC                                      |
| P <sub>BAD</sub> -siaA-F     | Creation of pJN105::P <sub>BAD</sub> -siaA                 | ATCCGGTCTAGACTAGTCGAATCGGAAGG<br>ACAGGATGG                        |
| P <sub>BAD</sub> -siaA-R     | Creation of pJN105::P <sub>BAD</sub> -siaA                 | CCGGATCCCGGGGGATAGCCATGGCGGC<br>GAAC                              |
| P <sub>BAD</sub> -siaB-F     | Creation of pJN105::P <sub>BAD</sub> -siaB                 | ATCCGGTCTAGATCAGATCACGGCGCGCA<br>G                                |
| P <sub>BAD</sub> -siaB-R     | Creation of pJN105::P <sub>BAD</sub> -siaB                 | CCGGATCCCGGGGGATAGCCATGGAAACG<br>CTAGACCTGCTGG                    |
| P <sub>BAD</sub> -siaC-F     | Creation of pJN105::P <sub>BAD</sub> -siaC                 | ATCCGGTCTAGACTACTCGTCTGGGCCT<br>GGAT                              |
| P <sub>BAD</sub> -siaC-R     | Creation of pJN105::P <sub>BAD</sub> -siaC                 | CCGGATCCCGGGGAAGAACCACCATCATG<br>AGTGACCT                         |
| P <sub>BAD</sub> -siaD-F     | Creation of pJN105::P <sub>BAD</sub> -siaD                 | ATCCGGGAGCTCTCAGCGCGCTGGAGCC                                      |
| P <sub>BAD</sub> -siaD-R     | Creation of pJN105::P <sub>BAD</sub> -siaD                 | CCGGATTCTAGAGAACGGGTCGCCGAGCT<br>G                                |
| P <sub>BAD</sub> -siaD-his-R | Creation of pJN105::P <sub>BAD</sub> -siaD-his             | ATCCGGGAGCTCTCAGTGATGATGATGATG<br>ATGATGATGATG<br>GCGCGCTGGAGCCGG |
| P <sub>BAD</sub> -psID-F     | Creation of pJN105::P <sub>BAD</sub> -psID                 | ATCCGGTCTAGAATCATGACCTACAGGAAG<br>TGCT                            |
| P <sub>BAD</sub> -psID-R     | Creation of pJN105::P <sub>BAD</sub> -psID                 | CCGGATGAGCTCTCAGCGATCATTGTTGAC<br>GGT                             |
| siaD <sup>E142A</sup> -F     | For sited directed mutagenesis                             | GGCGGCGAGGcATTTCCTCCTG                                            |
| siaD <sup>E142A</sup> -R     | For sited directed mutagenesis                             | CCAGCGGCCGCAGAGGTC                                                |
| psIA RT-F                    | For qPCR                                                   | TGCACAAGATCAAGAAACGCGTGG                                          |
| psIA RT-R                    | For qPCR                                                   | ACGGAACAGGATGTAGAGGTCGAA                                          |
| rpoD RT-F                    | For qPCR                                                   | GAACAGGCCGAGGAAGTCGG                                              |
| rpoD RT-R                    | For qPCR                                                   | GCCGAGCTGTTTCATGCCGAT                                             |

**Supplementary Figures**

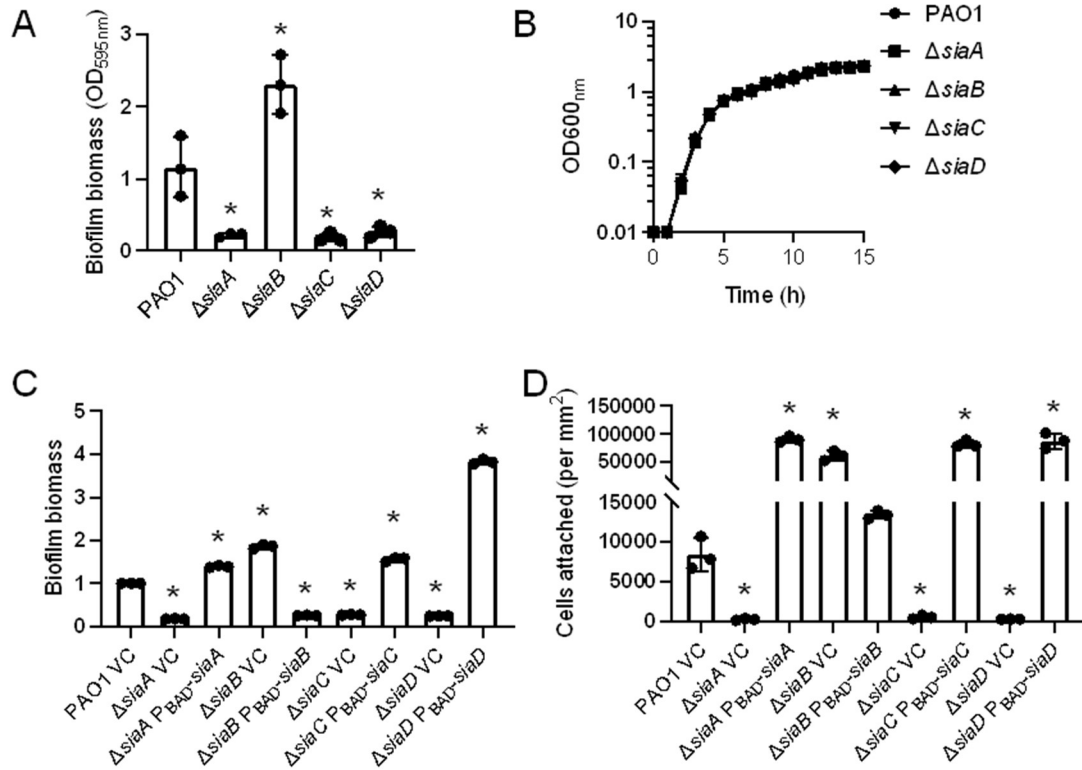

**Supplemental Figure 1: Attachment and biofilm formation of *sia* mutants and overexpression strains.** (A) Raw values from the static biofilm formation assay shown in Figure 1B. Biofilm biomass produced by each strain was measured by crystal violet staining. Presented as mean and standard deviation. N = 3 biological replicates, \*p<0.05. (B) Growth curve of *sia* mutants in Lennox Broth. (C) Static biofilm formation by *sia* overexpression strains Biofilm biomass produced by each strain was measured by crystal violet staining and normalized to the wild-type vector control (PAO1 VC). (D) Pair-wise statistical comparisons, p-values, of the initial attachment data presented in Fig 1C. (E) Adherence of *sia* overexpression strains. Cells were incubated on a glass coverslip, rinsed and attached cells were immediately quantified by microscopy. Normalized to the wild-type vector control (PAO1 VC), VC=vector control. Presented as mean and standard deviation. N = 3 biological replicates, \*p<0.05.

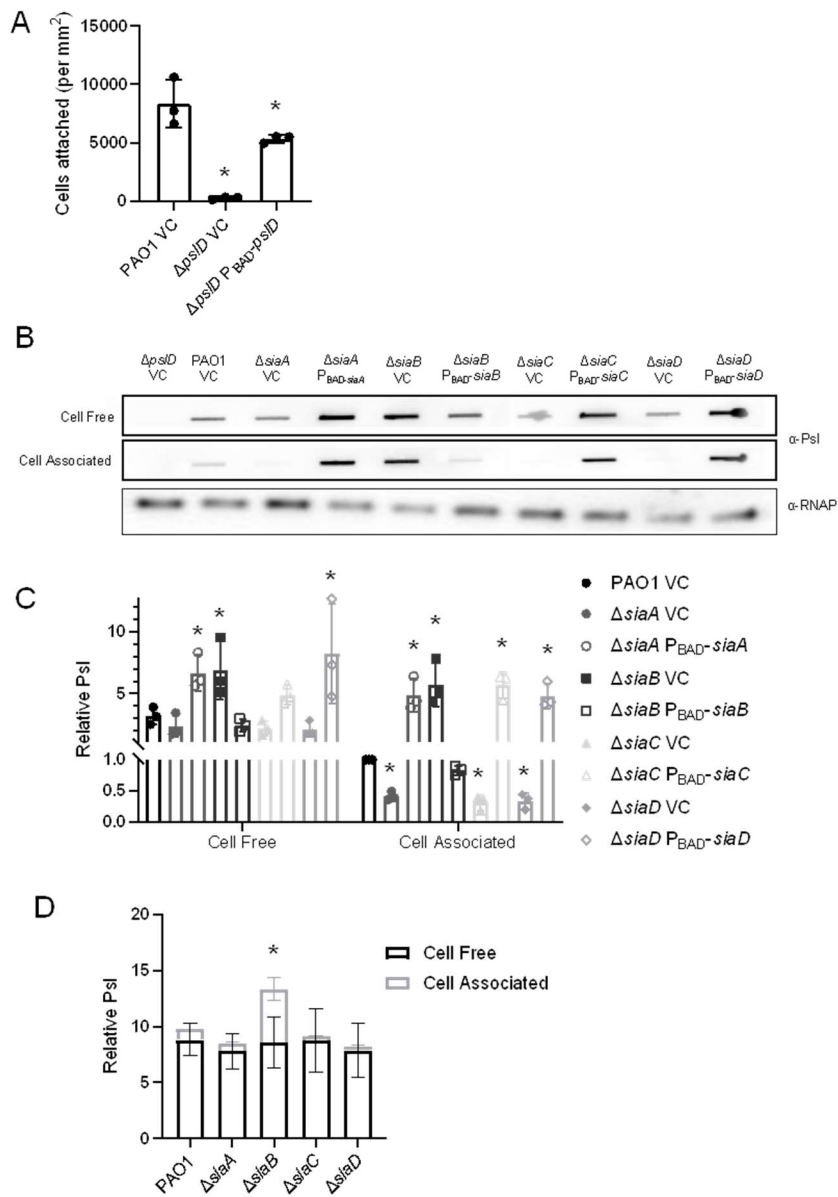

**Supplemental Figure 2: Psl production of *sia* mutants and overexpression strains.** (A) Adherence of the *pslD* complementation strain. Cells were incubated on a glass coverslip, rinsed and attached cells were immediately quantified by microscopy. (B) Representative immunoblot for Psl from *sia* mutant overexpression strains, extracted from mid-log planktonic cells (OD<sub>600nm</sub>=0.5). RNAP served as a loading control. (C) Quantification of relative Psl production calculated using blots in S2B. Psl band intensity was normalized to RNAP levels and then compared to the wild-type vector control (PAO1 VC) cell-associated Psl. VC=vector control. (D) Quantification of Psl produced by *sia* mutants. Re-graphing of data presented in **Fig 2C**. Presented as mean and standard deviation. N = 3 biological replicates, \*p<0.05.

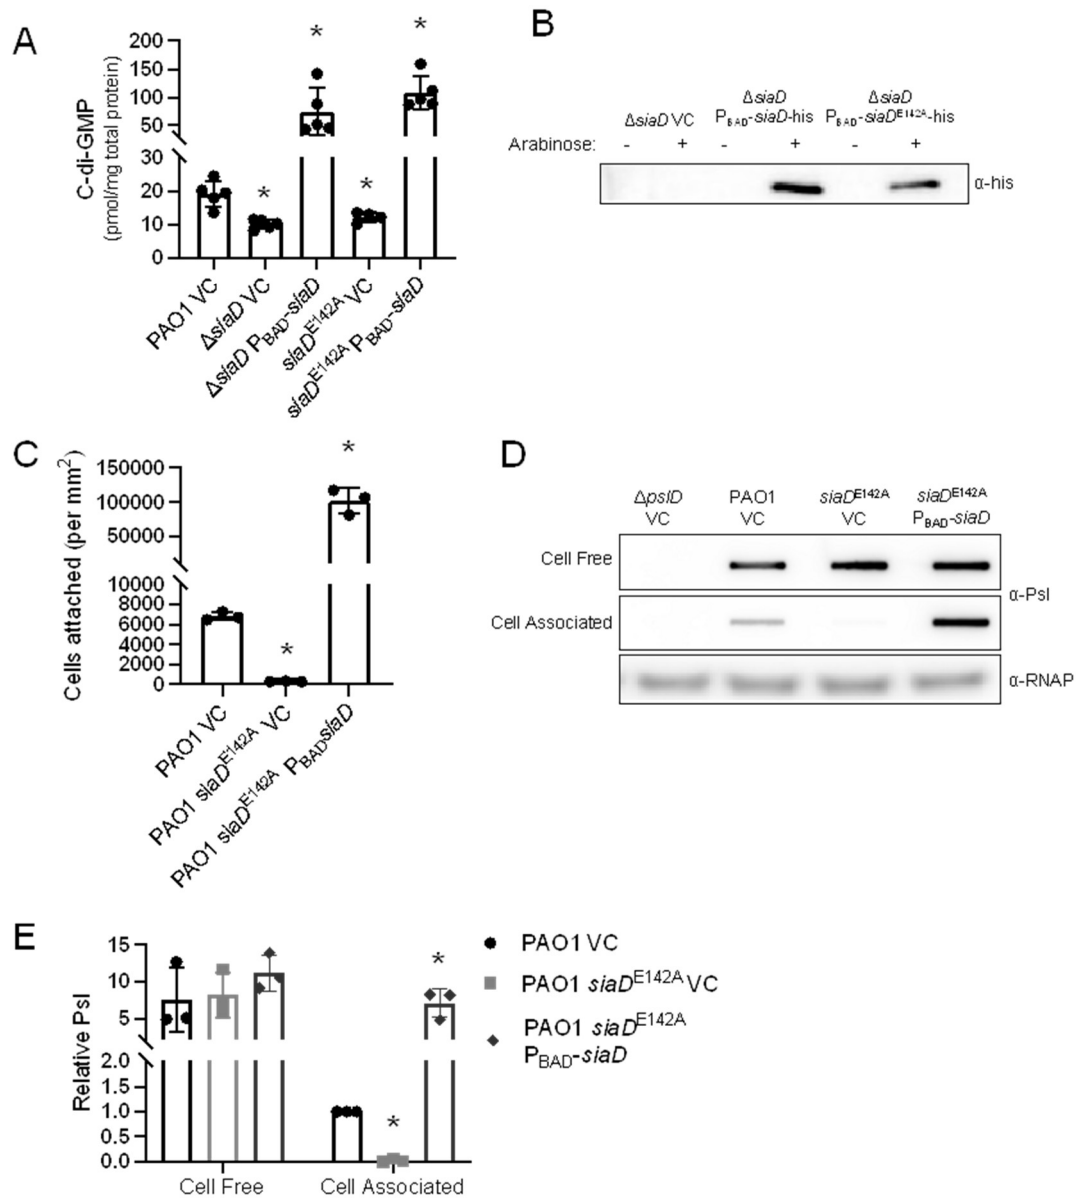

**Supplemental Figure 3: C-di-GMP, attachment, and Psl production of *siaD* and *siaD*<sup>E142A</sup>**

**overexpression strains.** (A) C-di-GMP levels of  $\Delta$ *siaD* and *siaD*<sup>E142A</sup> when SiaD is overexpressed. C-di-GMP was extracted from mid-log planktonic cells (OD<sub>600nm</sub>=0.5). Presented as mean and standard deviation. N = 5 biological replicates, \*p<0.05. (B) Representative  $\alpha$ -his immunoblot for SiaD-his and *SiaD*<sup>E142A</sup>-his to confirm protein expression and stability. (C) Adherence for *siaD*<sup>E142A</sup> when SiaD is overexpressed. Cells were incubated on a glass coverslip, rinsed, and attached cells were immediately quantified by microscopy. (D) Representative immunoblot for Psl from mid-log, planktonic cells

(OD<sub>600nm</sub>=0.5) for the *siaD*<sup>E142A</sup> when SiaD is overexpressed. RNAP served as a loading control. (E)  
Quantification of relative Psl production calculated using blots in S3D. Psl band intensity was normalized to RNAP levels and then compared to the wild-type vector control (PAO1 VC) cell-associated Psl. Presented as mean and standard deviation. N = 3 biological replicates, \*p<0.05. VC=vector control.

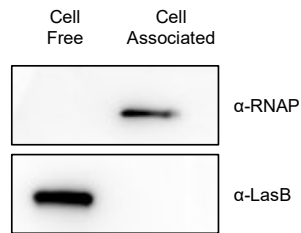

**Supplemental Figure 4: Separation of cell-free and cell-associated fractions.**

Representative immunoblot for RNAP and LasB after separation into cell-free and cell-associated fractions by centrifugation. RNAP is only found in the cell-associated fraction, and the cell-free protease LasB is only found in the cell-free fraction. N = 3 biological replicates.
